# Supplementary material for: Self-assembly and nonlinear optical properties of a synthetic dipeptide
Source: Royal Society of Chemistry journal article supplement (doi:10.1039/c2jm34338j), 2012-01-01
Supplement: c2jm34338j.pdf [file c2jm34338j.pdf]

**Supporting information**

**Self-assembly and nonlinear optical property of a synthetic dipeptide †**

Suman Kumar Maity, Ravi Kumar, Deepak K. S. Ambast, Bipul Pal\* and Debasish Haldar\*

Department of Chemical Sciences, Indian Institute of Science Education and Research –Kolkata,  
Mohanpur, West Bengal- 741252, India.

E-mail: [deba\\_h76@yahoo.com](mailto:deba_h76@yahoo.com)

|                            |    |
|----------------------------|----|
| ESI Figure 1               | 2  |
| ESI Figure 2               | 3  |
| ESI Figure 3               | 4  |
| ESI Figure 4, ESI Figure 5 | 5  |
| Figure S1                  | 6  |
| Figure S2                  | 7  |
| Figure S3                  | 8  |
| Figure S4                  | 9  |
| Figure S5                  | 10 |
| Figure S6                  | 11 |
| Figure S7                  | 12 |
| Figure S8                  | 13 |
| Figure S9                  | 14 |
| Figure S10                 | 15 |
| Figure S11                 | 16 |

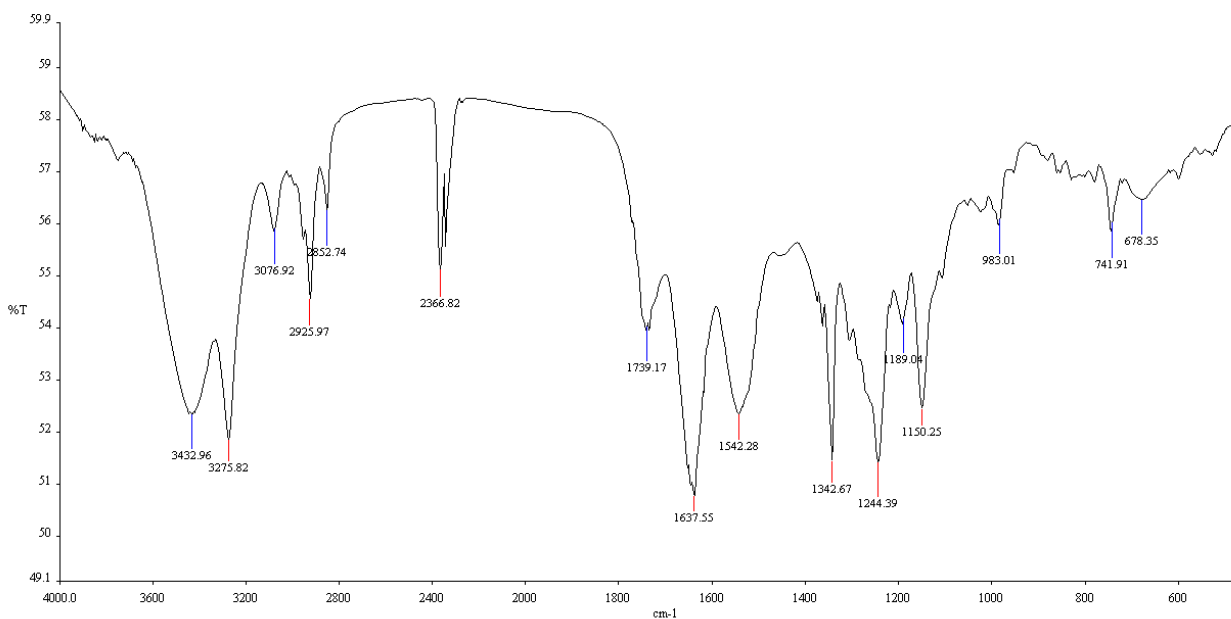

(a)

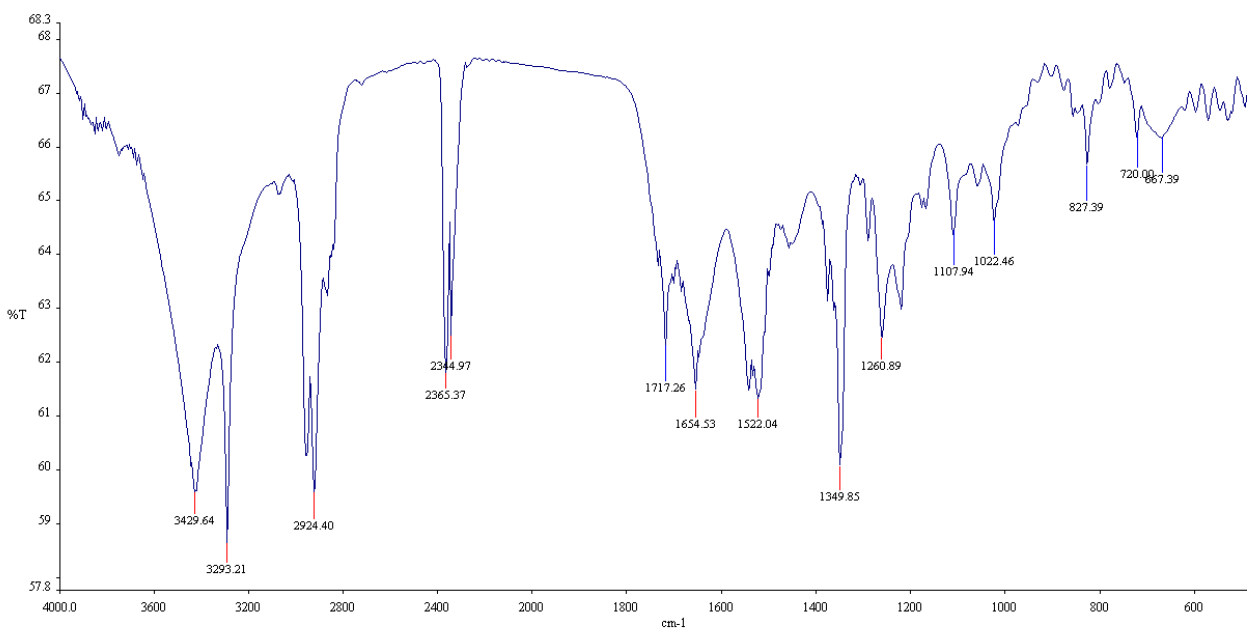

(b)

**ESI Fig. 1:** IR spectra of (a) peptide 1 and (b) peptide 2.

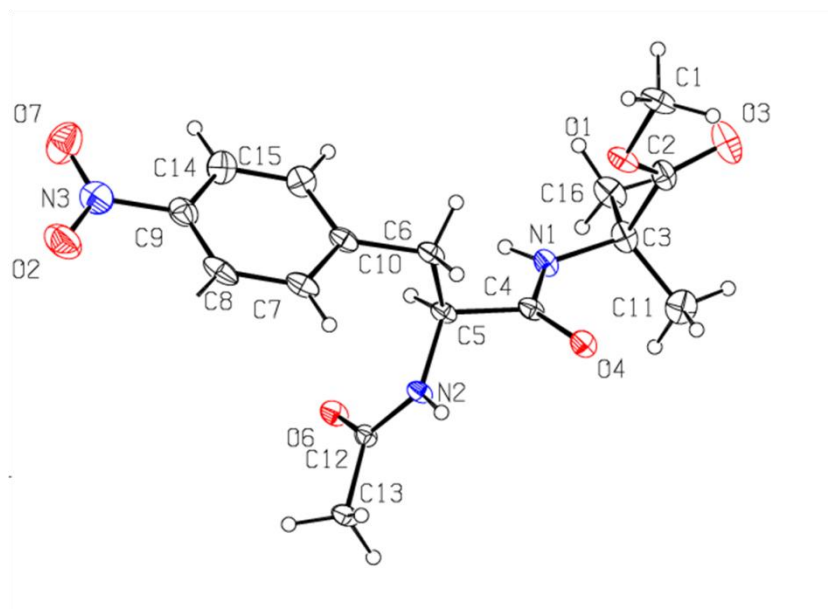

(a)

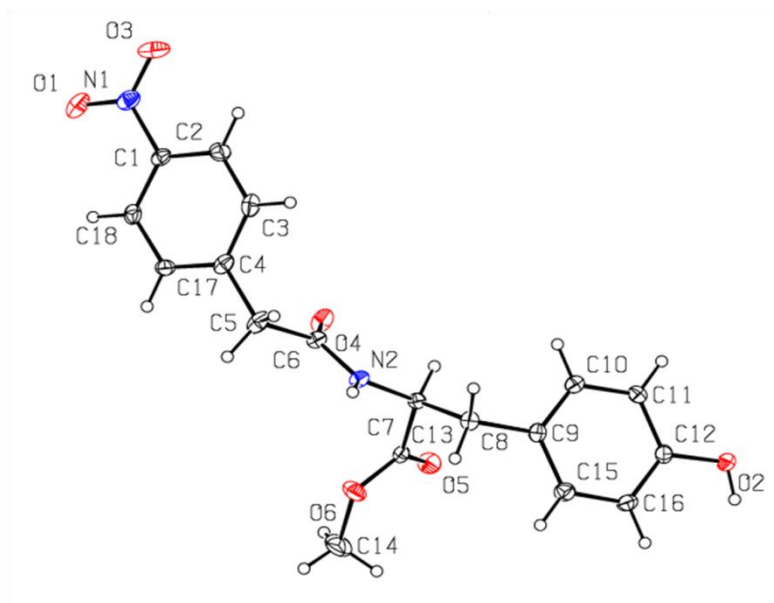

(b)

**ESI Fig. 2:** ORTEP diagram of (a) peptide 1 and (b) peptide 2 showing the atomic numbering scheme. Ellipsoids are drawn at the 50% probability level.

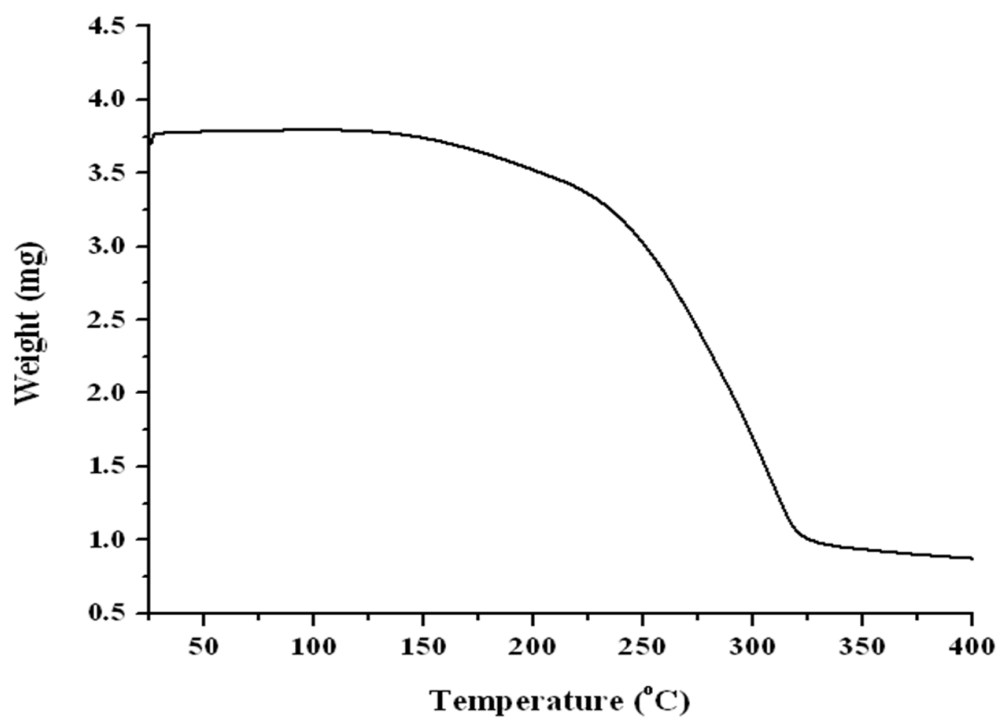

(a)

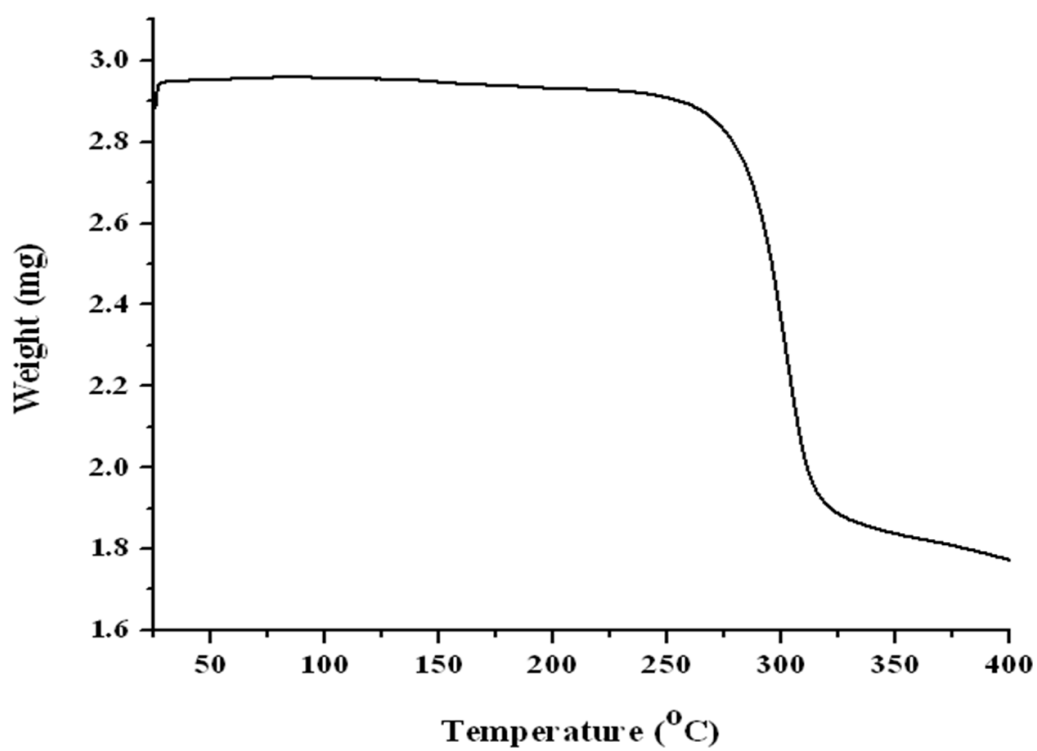

(b)

ESI Fig. 3: TGA-DTH spectra of (a) peptide 1 and (b) peptide 2.

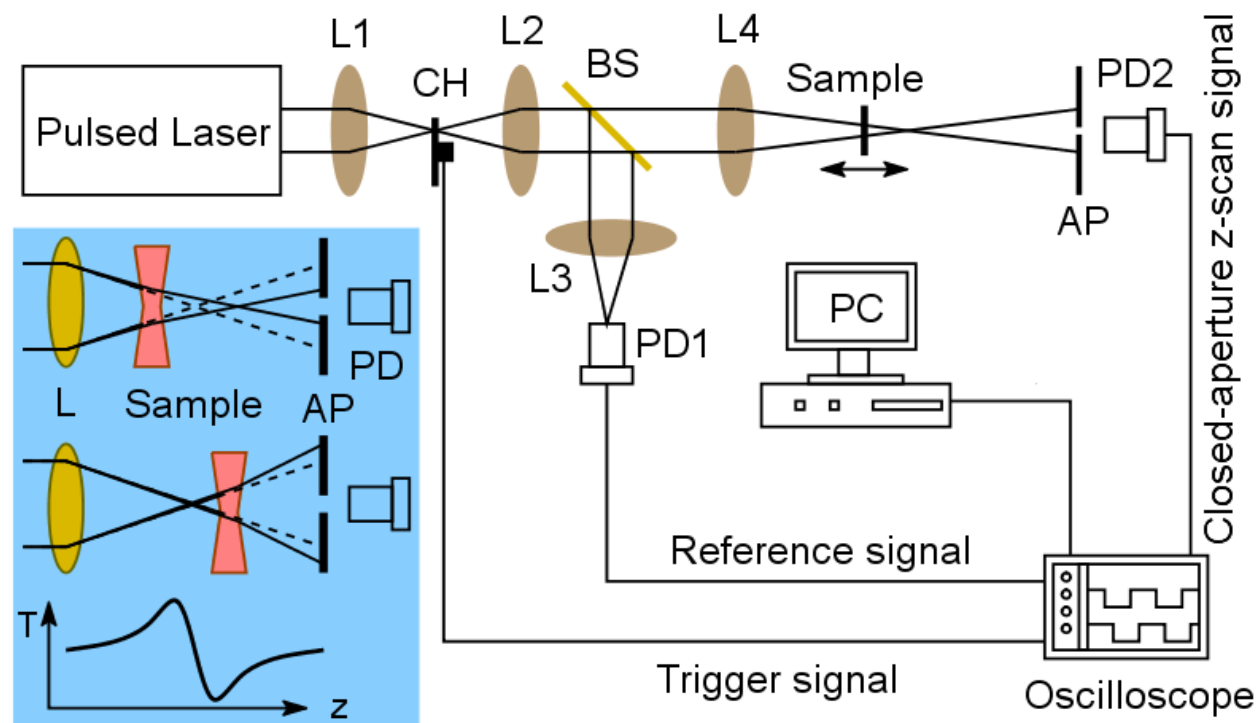

ESI Fig. 4: Schematic of Z-scan setup.

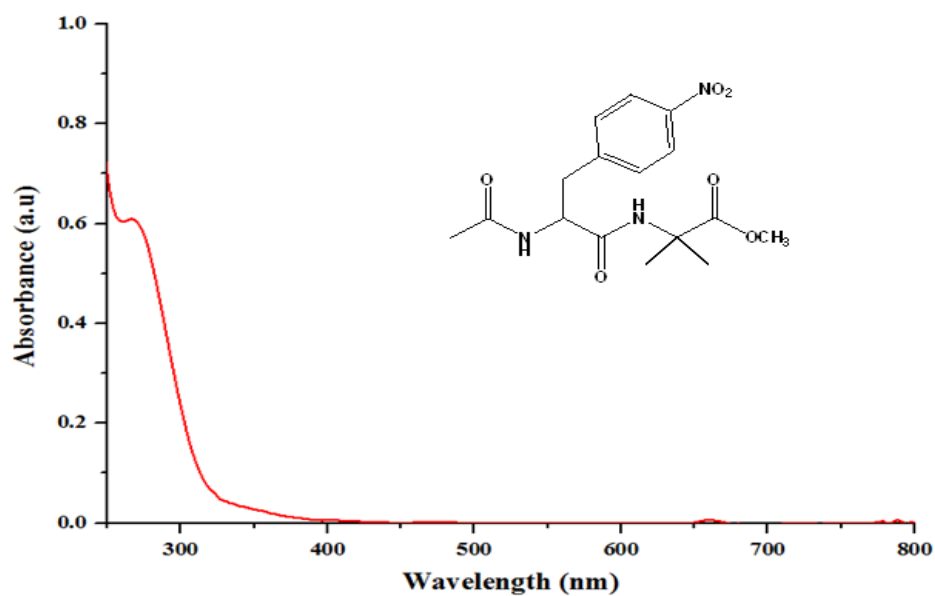

ESI Fig. 5: UV- visible spectra of peptide 1.

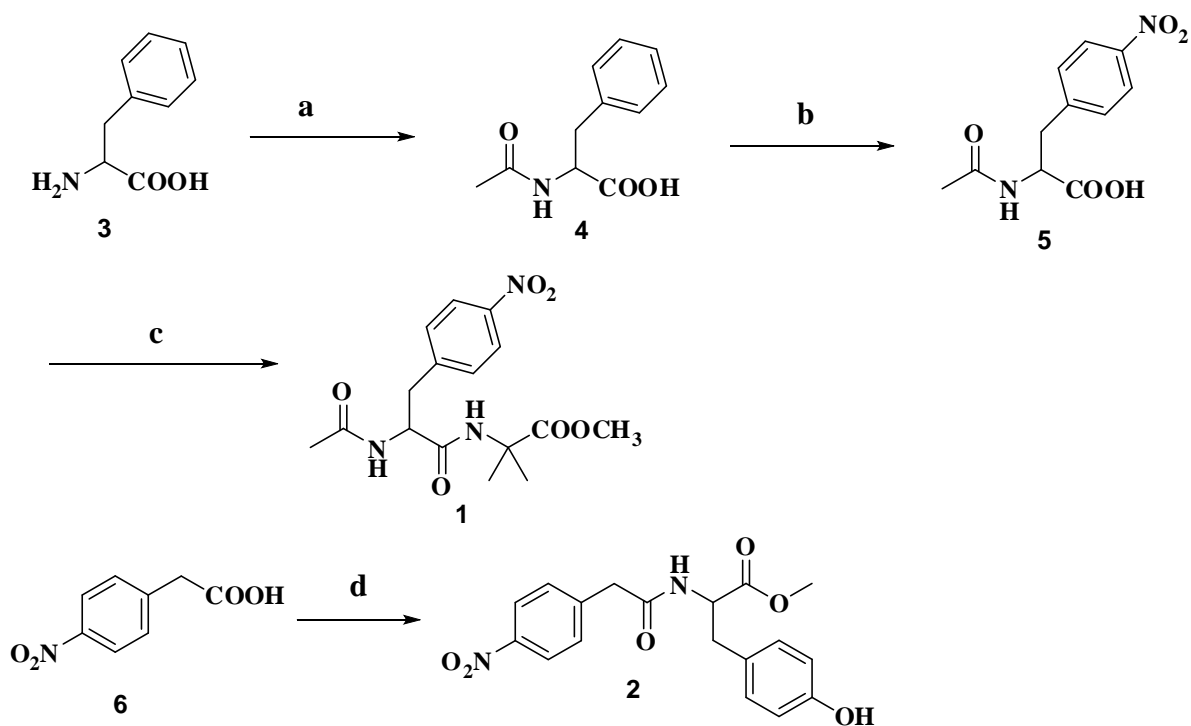

**Scheme 1:** Reactions and conditions: a)  $\text{CH}_3\text{COCl}$ , pyridine, 8h, 84%, b) conc.  $\text{H}_2\text{SO}_4$ , conc.  $\text{HNO}_3$ , 82%, c) dry DCM, H-Aib-COOCH<sub>3</sub>, DCC, HOBT, 0 °C, 80%, d) dry DCM, H-Tyr-COOCH<sub>3</sub>, DCC, HOBT, 0 °C, 85%.

**Fig. S1:** Schematic presentation of synthesis of peptide 1 and 2.

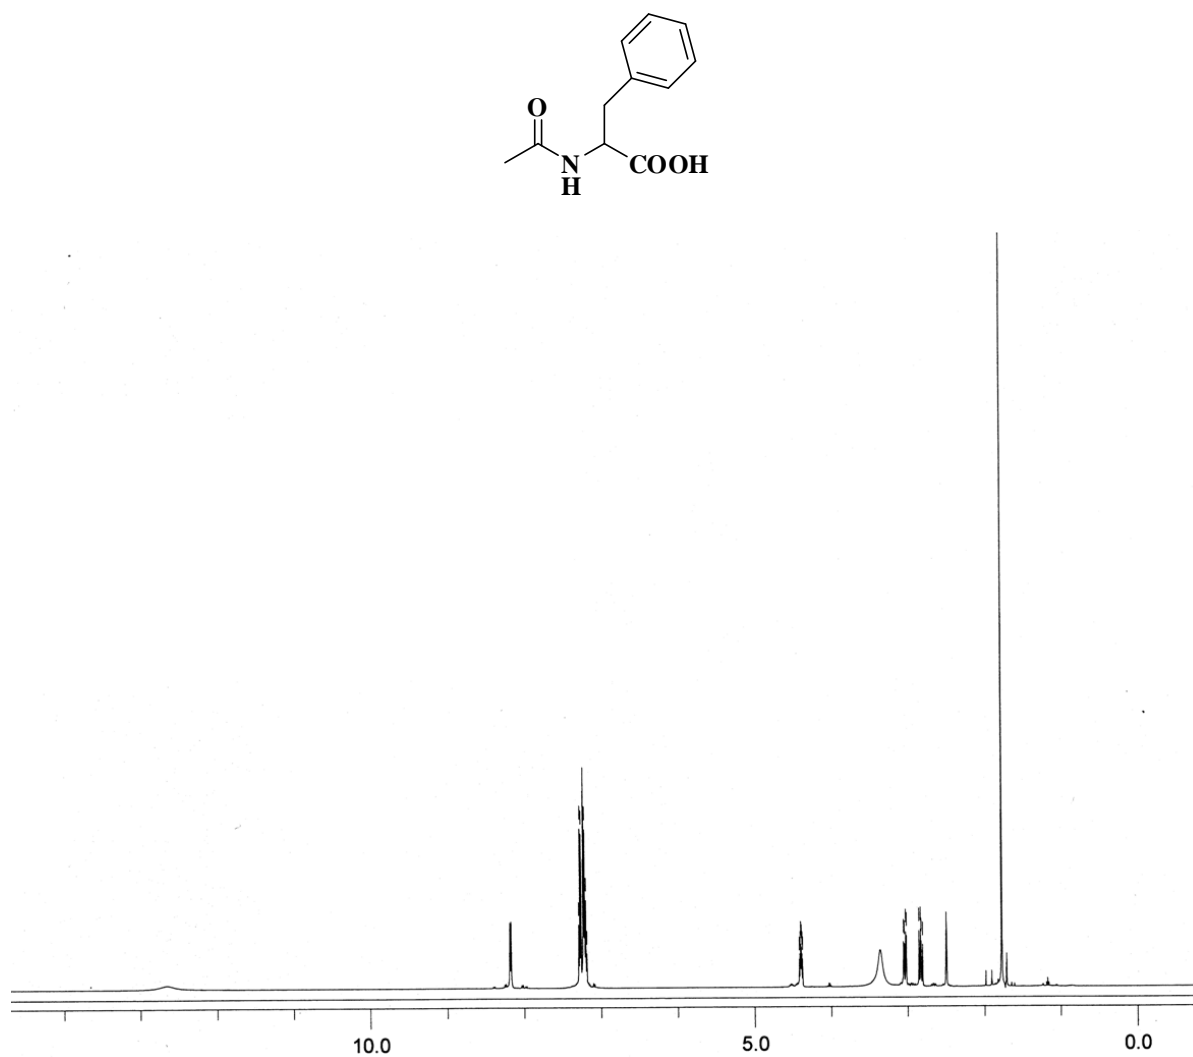

**Fig. S2:** <sup>1</sup>H NMR (500 MHz, DMSO-*d*<sub>6</sub>, δppm) spectrum of compound **4**.

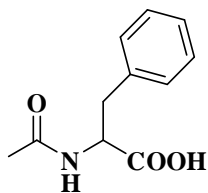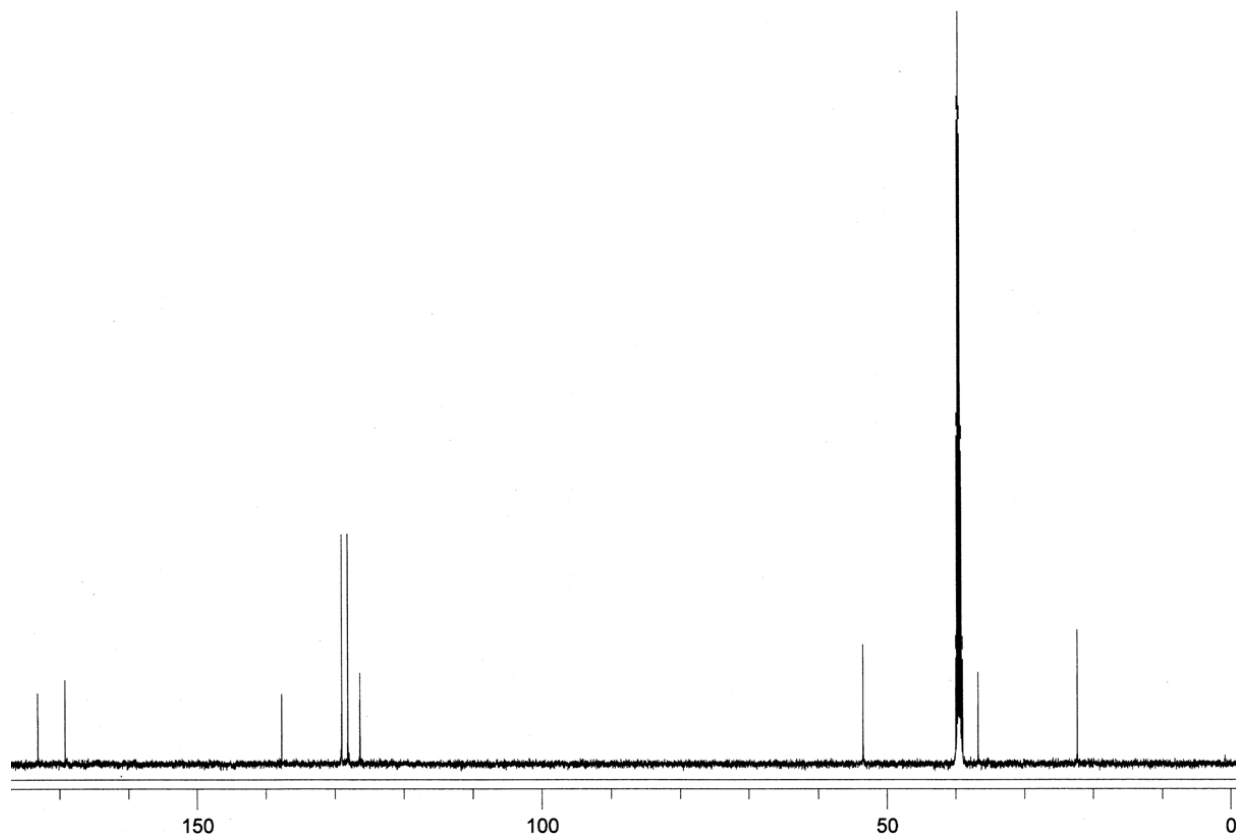

**Fig. S3:**  $^{13}\text{C}$  NMR (125 MHz,  $\text{DMSO}-d_6$ ,  $\delta\text{ppm}$ ) spectrum of compound **4**.



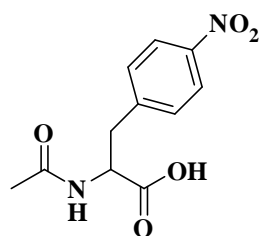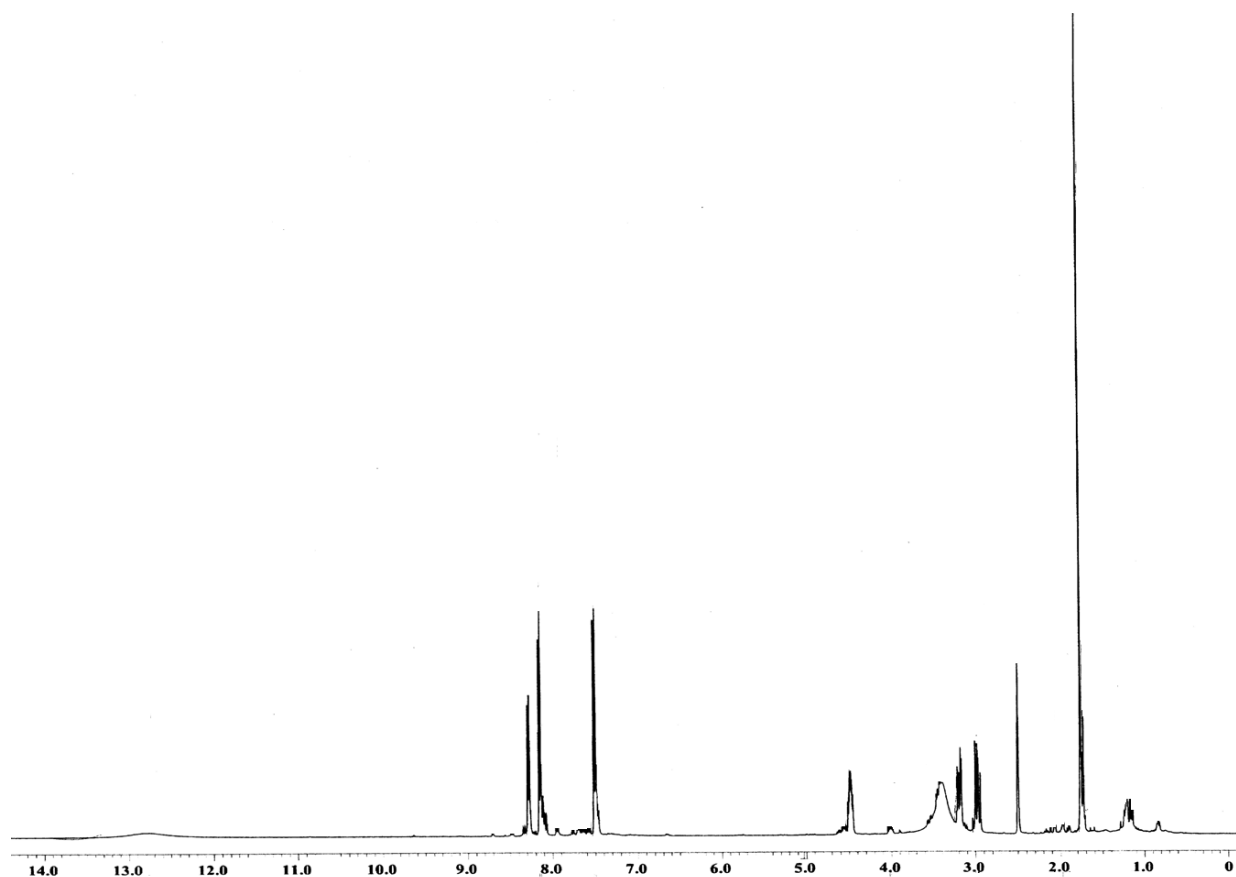

**Fig. S4:**  $^1\text{H}$  NMR (400 MHz,  $\text{DMSO}-d_6$ ,  $\delta\text{ppm}$ ) spectrum of compound **5**.

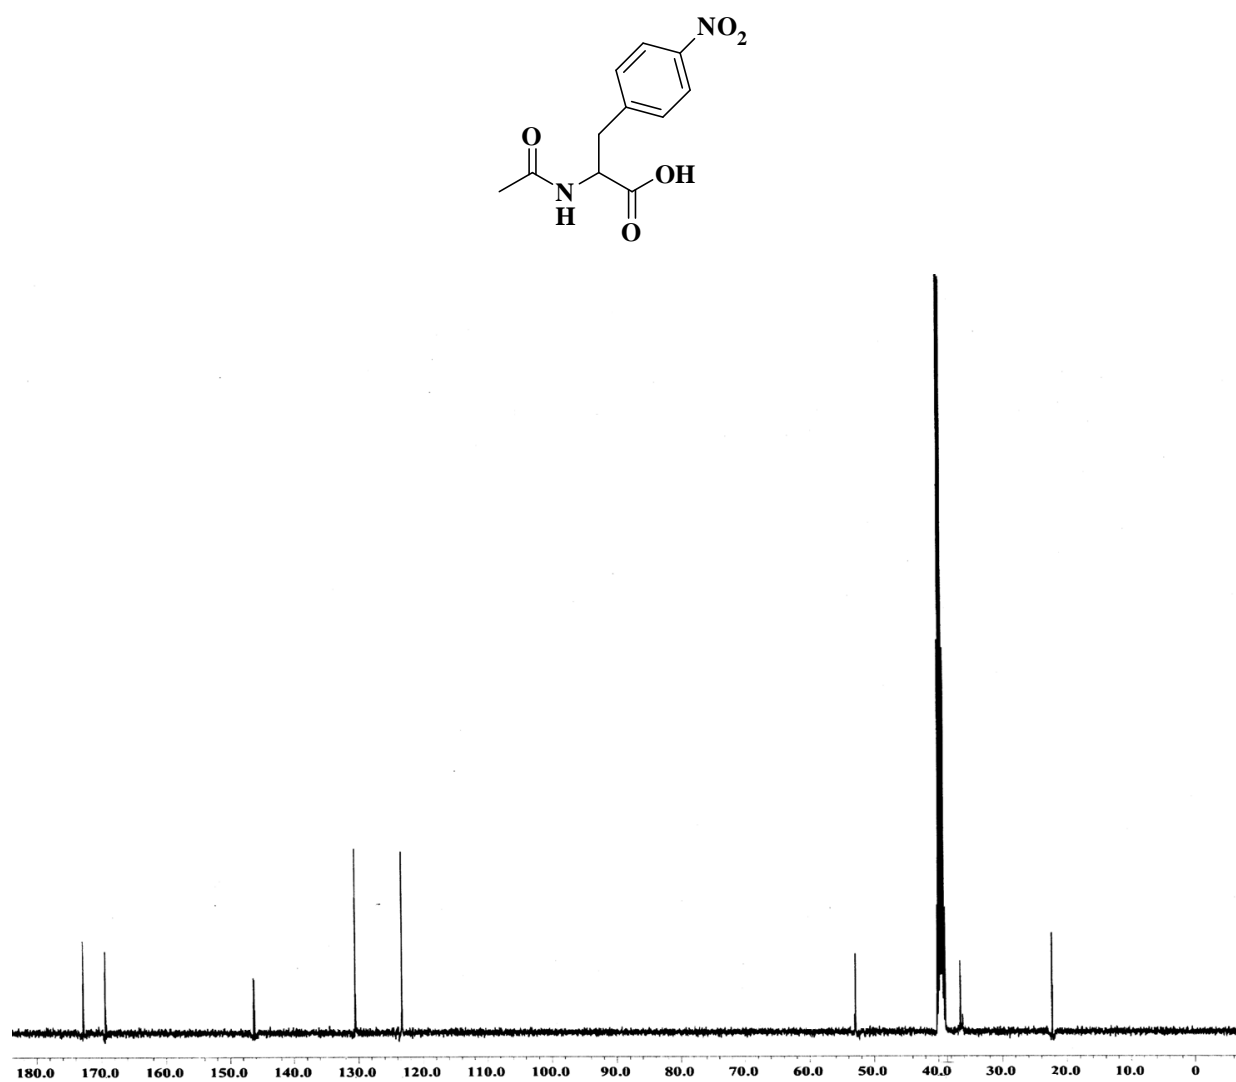

**Fig. S5:**  $^{13}\text{C}$  NMR (100 MHz,  $\text{DMSO}-d_6$ ,  $\delta\text{ppm}$ ) spectrum of compound 5.

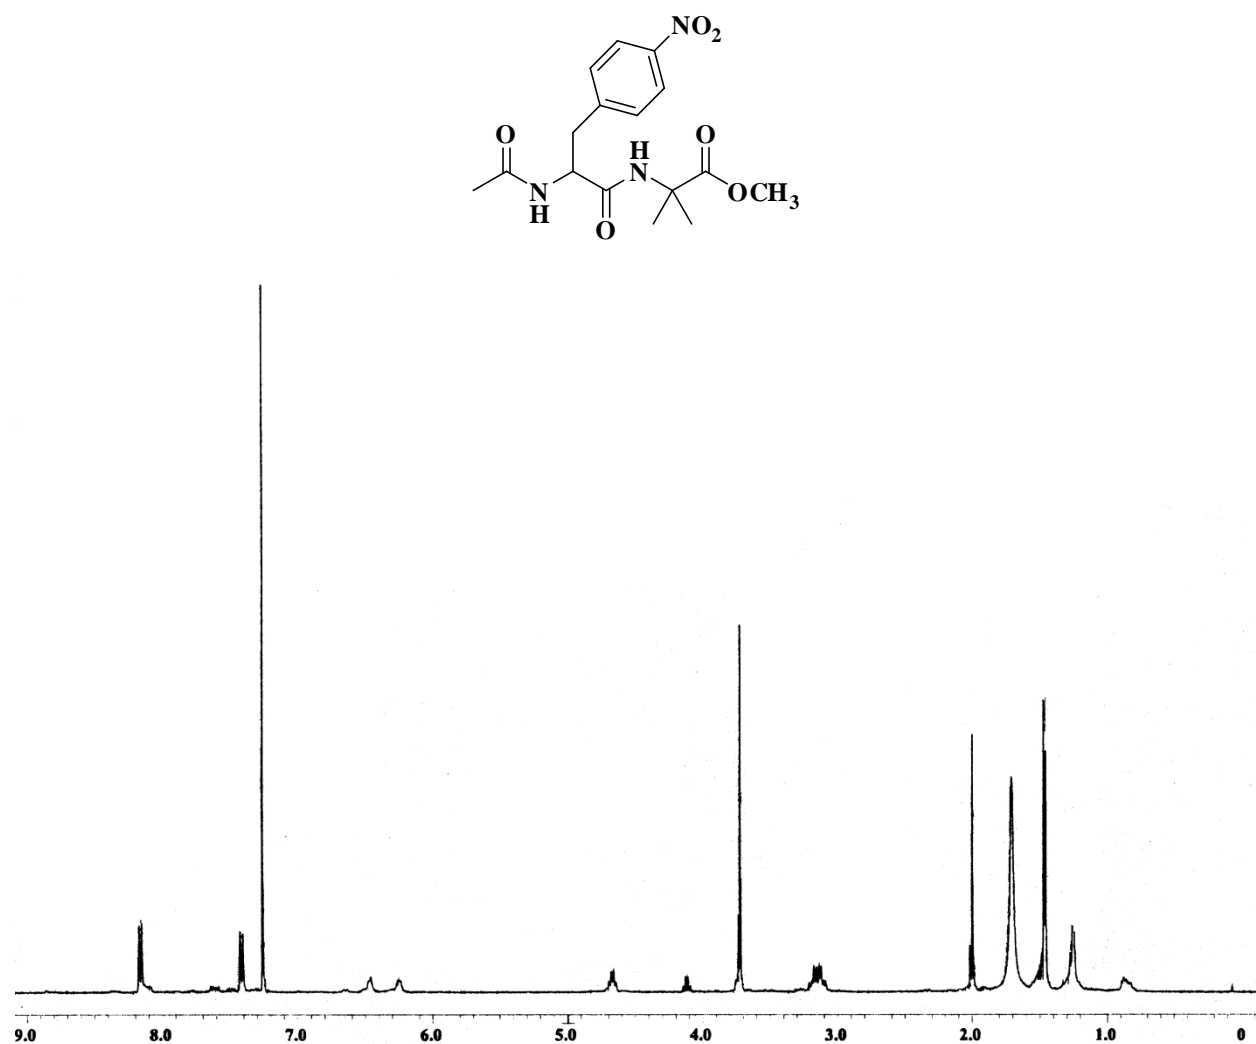

**Fig. S6:**  $^1\text{H}$  NMR (400 MHz,  $\text{CDCl}_3$ ,  $\delta\text{ppm}$ ) spectrum of peptide **1**.

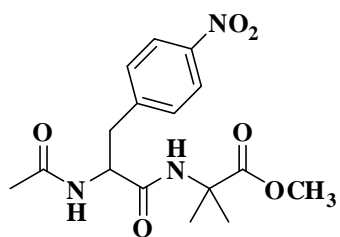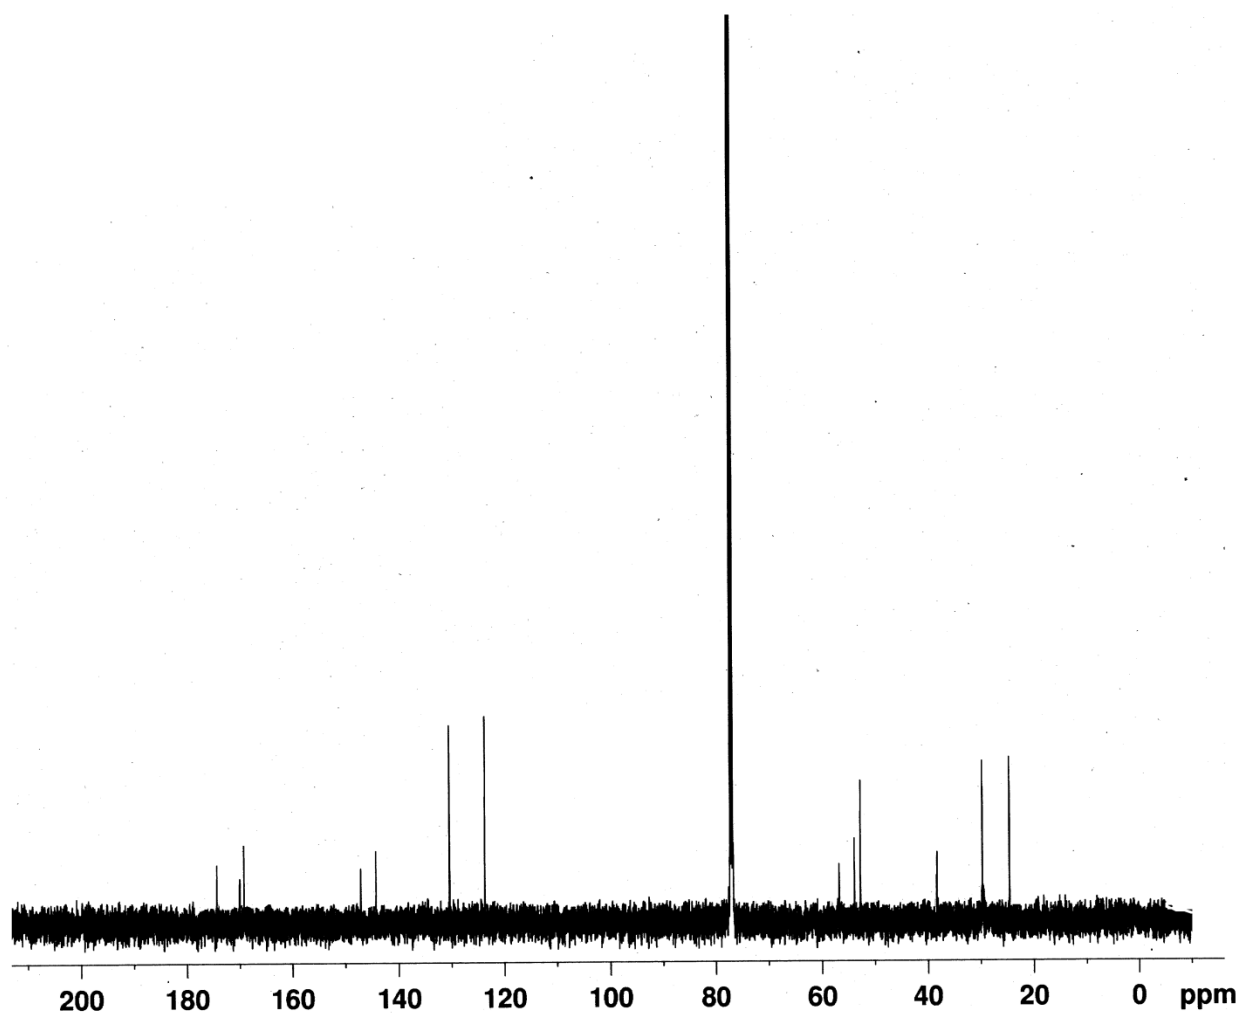

**Fig. S7:**  $^1\text{H}$  NMR (100 MHz,  $\text{CDCl}_3$ ,  $\delta\text{ppm}$ ) spectrum of peptide **1**.

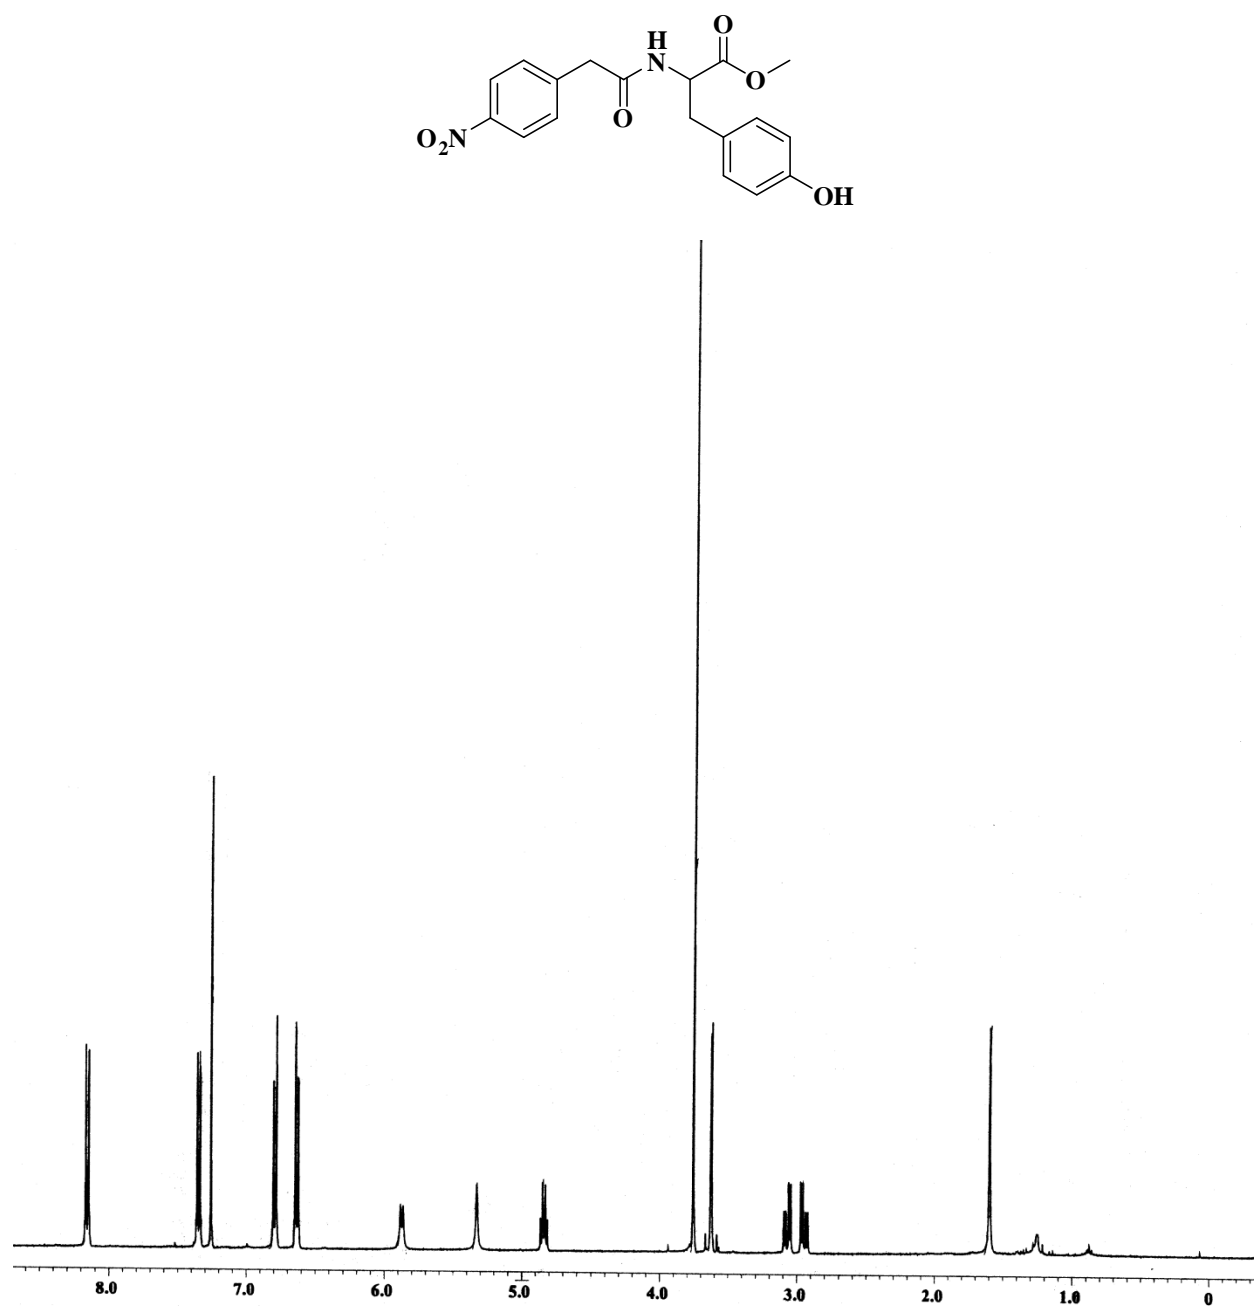

**Fig. S8:**  $^1\text{H}$  NMR (500 MHz,  $\text{CDCl}_3$ ,  $\delta$ ppm) spectrum of peptide 2.

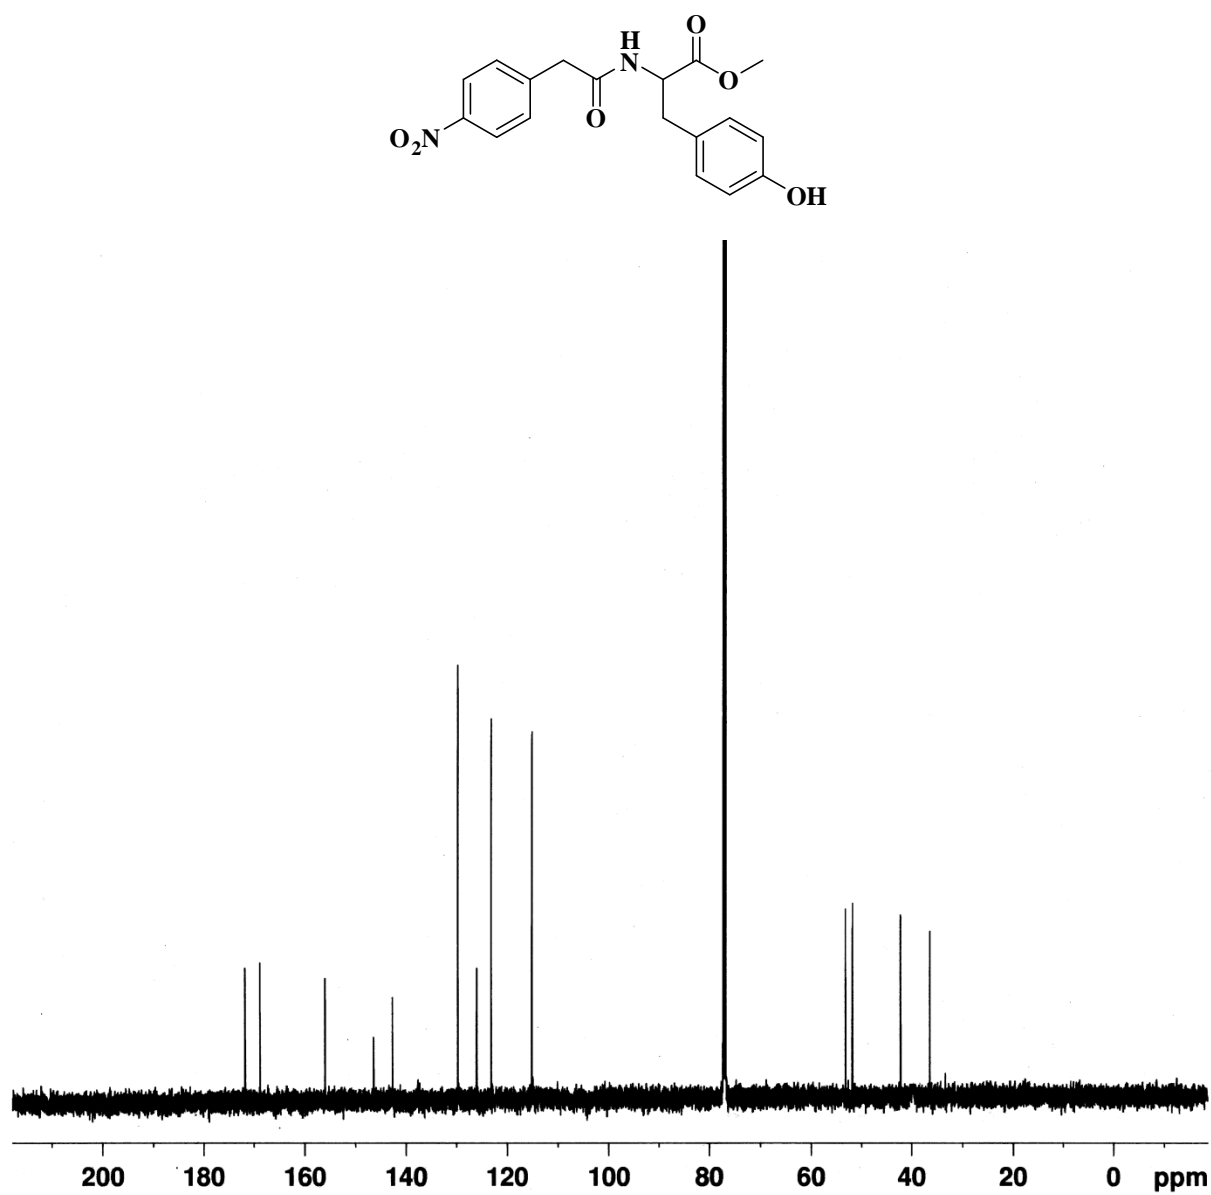

**Fig. S9:** <sup>13</sup>C NMR (125 MHz, CDCl<sub>3</sub>, δppm) spectrum of peptide 2.

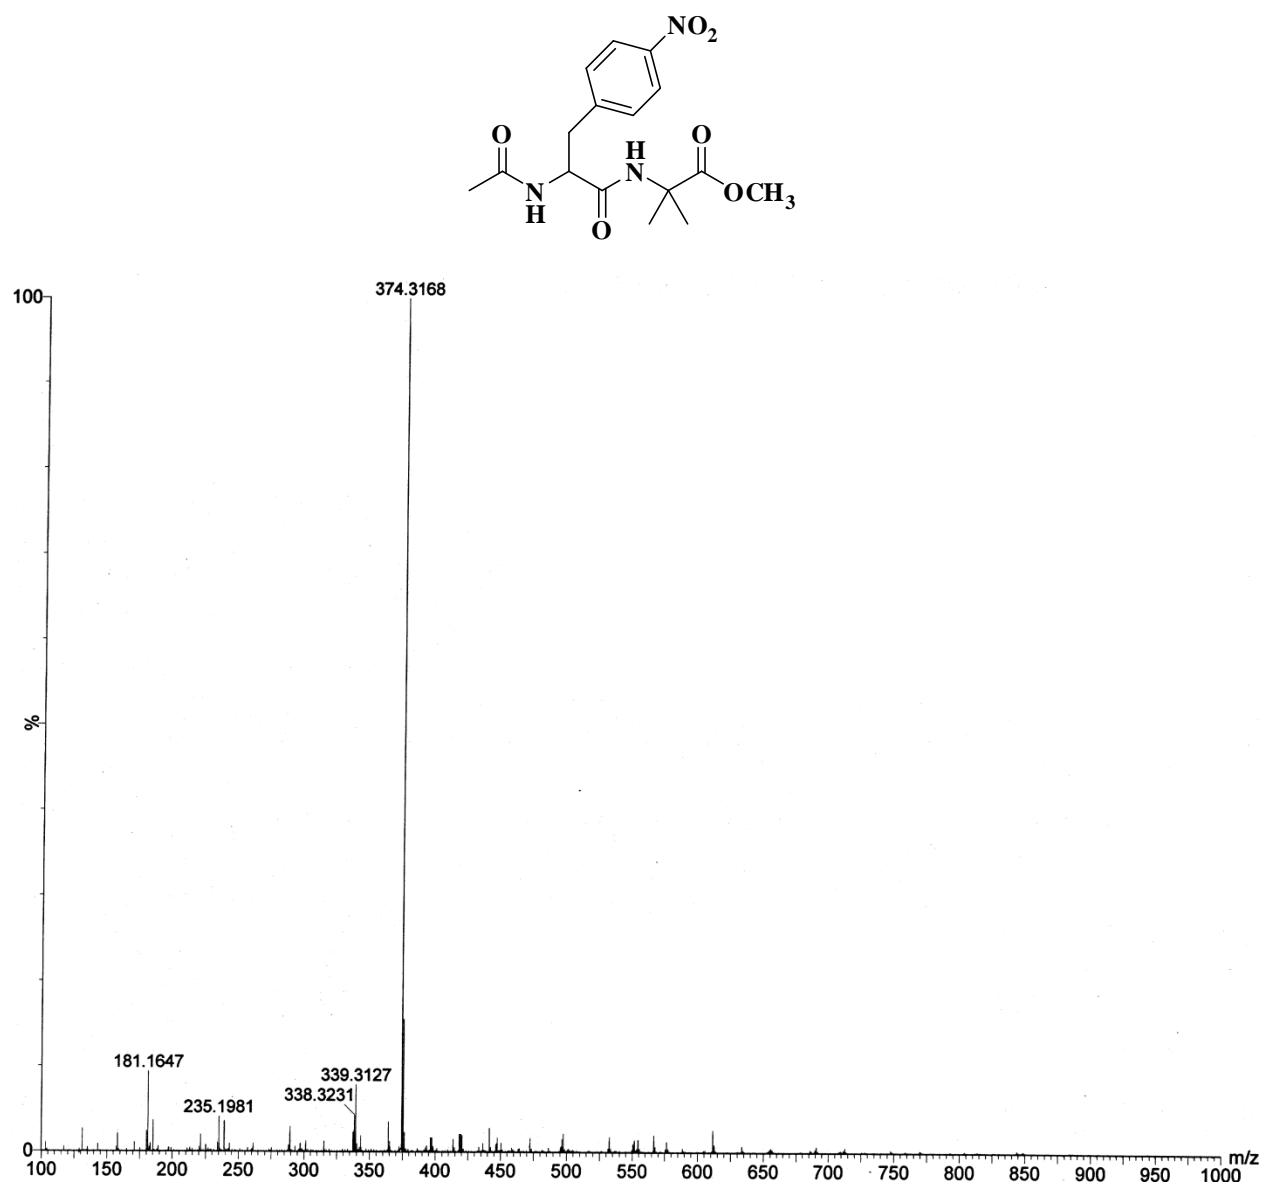

**Fig. S10:** Mass spectrum of peptide 1.

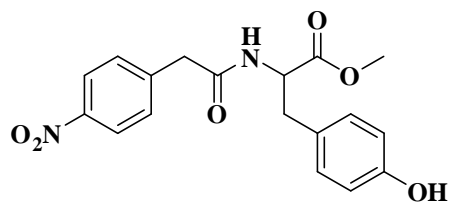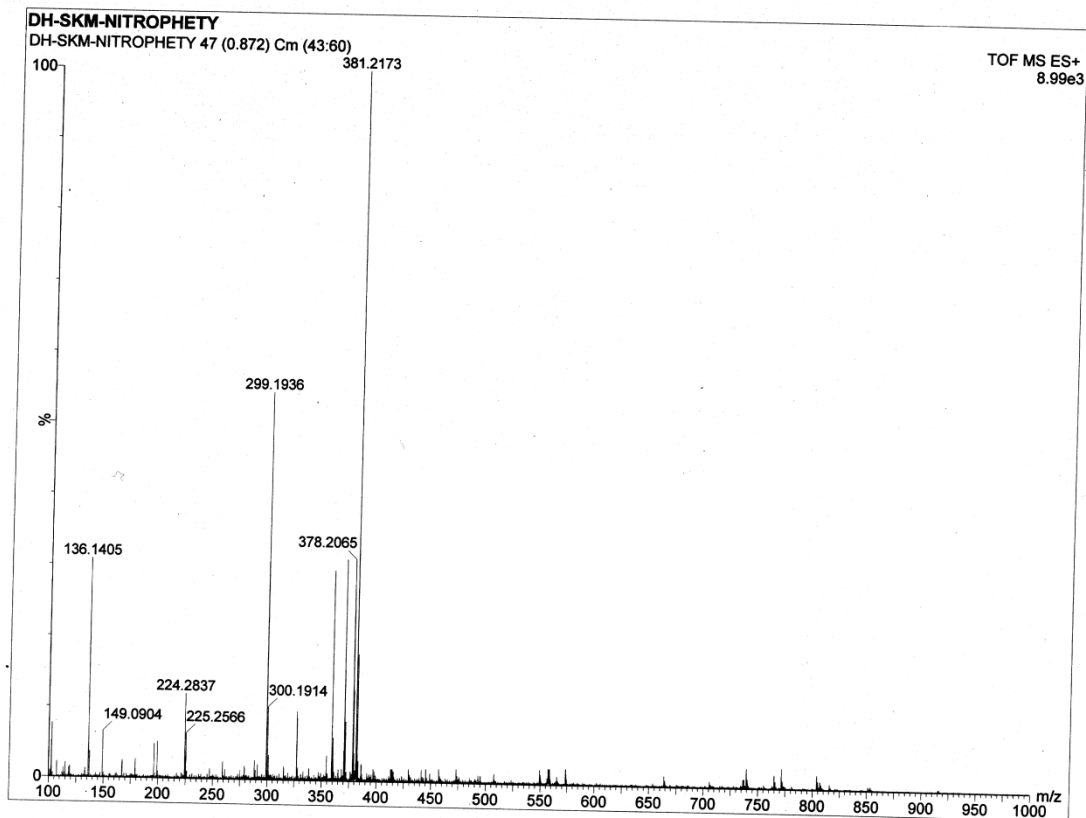

**Fig. S11:** Mass spectrum of peptide 2.
